# Supplementary material for: G-Protein-Coupled Receptors Mediate Modulations of Cell Viability and Drug Sensitivity by Aberrantly Expressed Recoverin 3 within A549 Cells
Source: MDPI journal article supplement (doi:10.3390/ijms24010771), 2023-01-01
Supplement: s1 [file s1]

**Supplemental Figure S2 Canonical network of G-protein coupled receptor (GPCR) signaling**

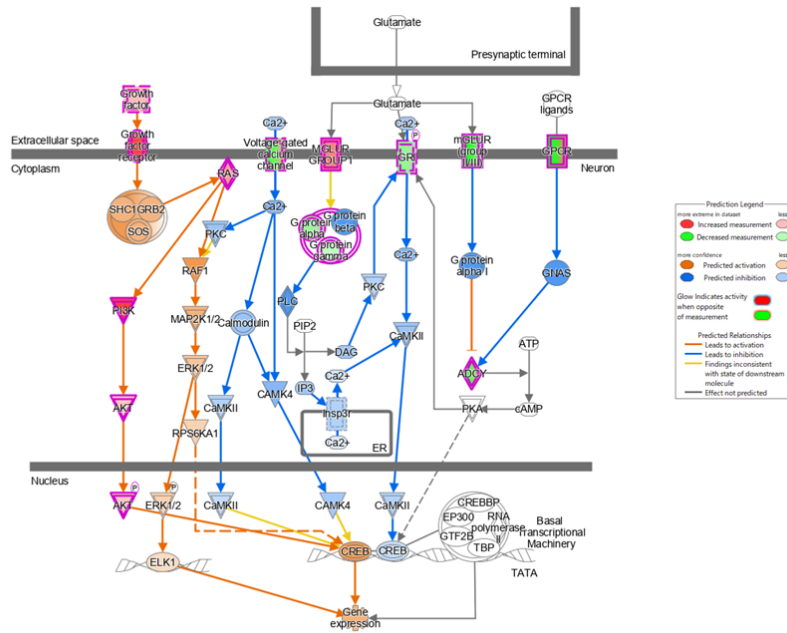

Supplemental Figure S3 Canonical network of CREB signaling

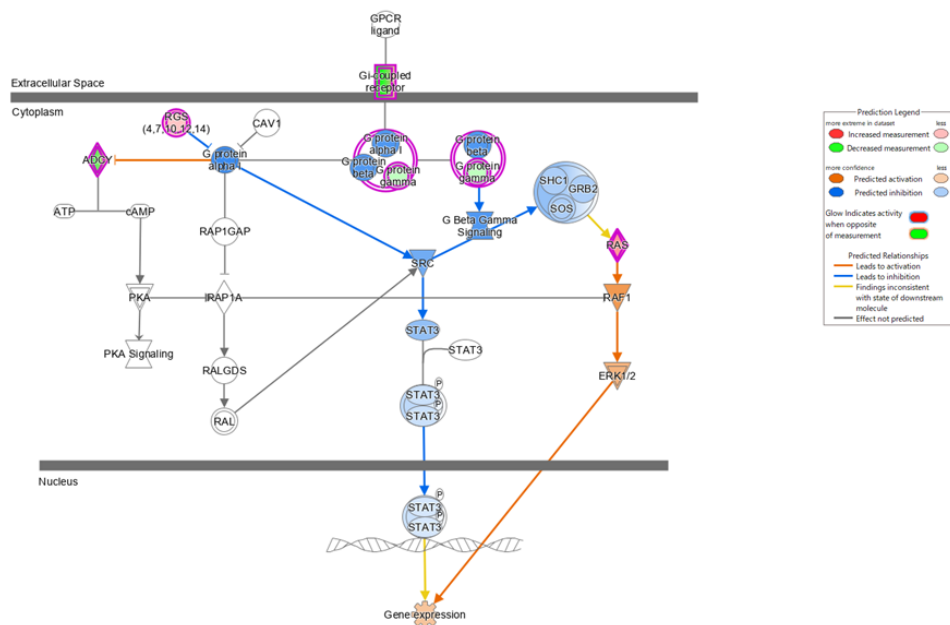

Supplemental Figure S4 Canonical network of Gia mediated signaling

**Supplemental Table S1.** Sequence reads and mapping information of A549 Mock and A549 Rec.

| Sample Name | Total reads | Trimmed Reads | Mapped reads | Mapping rate |
|-------------|-------------|---------------|--------------|--------------|
| A549_Rec1   | 35258092    | 34284440      | 33781100     | 98.53%       |
| A549_Rec2   | 42631970    | 41192892      | 40546696     | 98.43%       |
| A549_Rec    | 34299918    | 33567356      | 32962995     | 98.20%       |
| A549_Mock1  | 36606010    | 35473726      | 34947741     | 98.52%       |
| A549_Mock2  | 35675928    | 34243940      | 33723546     | 98.48%       |
| A549_Mock   | 35126452    | 34364062      | 33782843     | 98.31%       |

**Supplemental Table S2.** List of the up-regulated or down-regulated DEGs (FDR adjusted  $p > 0.05$  and  $q < 0.08$ ) between A549 MOCK and A549 Rec.

| gene_sym | log2FoldChange | p-value | q-value | Cellular_Component_Term                                                                                                                      | Molecular_Function_Term                                                                                                                                                                                                                      | Biological_Process_Term                                                                                                                                          |
|----------|----------------|---------|---------|----------------------------------------------------------------------------------------------------------------------------------------------|----------------------------------------------------------------------------------------------------------------------------------------------------------------------------------------------------------------------------------------------|------------------------------------------------------------------------------------------------------------------------------------------------------------------|
| RCVRN    | 14.73          | <0.001  | <0.001  | perikaryon, dendrite, membrane, photoreceptor inner segment, photoreceptor outer segment,                                                    | calcium sensitive guanylate cyclase activator activity, calcium ion binding,                                                                                                                                                                 | regulation of calcium ion transport, positive regulation of guanylate cyclase activity, phototransduction, visual perception, signal transduction,               |
| KIFC1    | 5.04           | >0.001  | 0.003   | mitotic spindle, membrane, microtubule, kinesin complex, microtubule organizing center, early endosome, nucleus,                             | ATP hydrolysis activity, microtubule binding, ATP binding, microtubule motor activity,                                                                                                                                                       | mitotic spindle assembly, cell division, mitotic metaphase plate congression, microtubule-based movement, mitotic sister chromatid segregation,                  |
| ATF6B    | 4.71           | 0.002   | 0.005   | RNA polymerase II transcription regulator complex, protein-DNA complex, Golgi apparatus, endoplasmic reticulum membrane, nucleus, chromatin, | sequence-specific double-stranded DNA binding, cAMP response element binding, protein binding, DNA-binding transcription factor activity, RNA polymerase II-specific, RNA polymerase II cis-regulatory region sequence-specific DNA binding, | ATF6-mediated unfolded protein response, endoplasmic reticulum unfolded protein response, signal transduction, regulation of transcription by RNA polymerase II, |

|            |      |        |        |                                                                                                    |                                                                                                                                                                                                                                                     |
|------------|------|--------|--------|----------------------------------------------------------------------------------------------------|-----------------------------------------------------------------------------------------------------------------------------------------------------------------------------------------------------------------------------------------------------|
|            |      |        |        | transcription cis-regulatory region binding,                                                       |                                                                                                                                                                                                                                                     |
|            |      |        |        |                                                                                                    | regulation of renin secretion into blood stream, melanocyte proliferation, cellular response to fatty acid, detection of chemical stimulus                                                                                                          |
| OR51E2     | 4.62 | 0.01   | 0.027  | intracellular organelle, early endosome membrane, integral component of membrane, plasma membrane, | signaling receptor activity, olfactory receptor activity, G protein-coupled receptor activity, nuclear steroid receptor activity,                                                                                                                   |
|            |      |        |        |                                                                                                    | involved in sensory perception of smell, regulation of blood pressure, regulation of cAMP-mediated signaling, steroid hormone mediated signaling pathway, melanocyte differentiation, cell migration, G protein-coupled receptor signaling pathway, |
| AC073911.3 | 4.55 | 0.015  | 0.026  |                                                                                                    |                                                                                                                                                                                                                                                     |
| AC107959.2 | 4.47 | 0.018  | 0.028  |                                                                                                    |                                                                                                                                                                                                                                                     |
| AP000240.1 | 4.3  | 0.037  | 0.042  |                                                                                                    |                                                                                                                                                                                                                                                     |
| AP001625.2 | 4.28 | 0.033  | 0.04   |                                                                                                    |                                                                                                                                                                                                                                                     |
| IL6R-AS1   | 4.1  | 0.01   | 0.023  |                                                                                                    |                                                                                                                                                                                                                                                     |
| AC020663.1 | 4    | 0.013  | 0.024  |                                                                                                    |                                                                                                                                                                                                                                                     |
| LENG8      | 3.79 | <0.001 | <0.001 | protein-containing complex, nucleus,                                                               | protein binding,                                                                                                                                                                                                                                    |
| BMS1P13    | 3.56 | 0.047  | 0.049  |                                                                                                    |                                                                                                                                                                                                                                                     |
| ERMARD     | 3.55 | 0.001  | 0.005  | integral component of membrane, endoplasmic reticulum membrane,                                    |                                                                                                                                                                                                                                                     |
| AC027307.3 | 3.53 | 0.018  | 0.029  |                                                                                                    |                                                                                                                                                                                                                                                     |
|            |      |        |        |                                                                                                    | metal ion binding, protein binding, DNA-binding transcription factor activity, RNA polymerase II-specific, RNA polymerase II cis-regulatory                                                                                                         |
| ZNF251     | 3.32 | >0.001 | 0.002  | nucleus,                                                                                           | hematopoietic stem cell homeostasis, regulation of transcription by RNA polymerase II,                                                                                                                                                              |

|            |      |        |        |                                                                                 |                                                                                             |                                                                                                                                                                                                                                                                                                                                                                                                                              |
|------------|------|--------|--------|---------------------------------------------------------------------------------|---------------------------------------------------------------------------------------------|------------------------------------------------------------------------------------------------------------------------------------------------------------------------------------------------------------------------------------------------------------------------------------------------------------------------------------------------------------------------------------------------------------------------------|
|            |      |        |        |                                                                                 | region sequence-specific DNA binding,                                                       |                                                                                                                                                                                                                                                                                                                                                                                                                              |
| DPH6-DT    | 3.1  | 0.038  | 0.043  |                                                                                 |                                                                                             |                                                                                                                                                                                                                                                                                                                                                                                                                              |
| AC009065.3 | 2.76 | 0.024  | 0.032  |                                                                                 |                                                                                             |                                                                                                                                                                                                                                                                                                                                                                                                                              |
| C4B-AS1    | 2.6  | 0.002  | 0.006  |                                                                                 |                                                                                             |                                                                                                                                                                                                                                                                                                                                                                                                                              |
|            |      |        |        |                                                                                 |                                                                                             | regulation of autophagosome assembly, extrinsic apoptotic signaling pathway in absence of ligand, apoptotic signaling pathway, regulation of release of cytochrome c from mitochondria, intrinsic apoptotic signaling pathway in response to DNA damage, extrinsic apoptotic signaling pathway via death domain receptors, autophagy, protein insertion into mitochondrial membrane involved in apoptotic signaling pathway, |
| MOAP1      | 2.44 | 0.009  | 0.024  | cytosol, mitochondrial outer membrane, mitochondrion, cytoplasm,                | ubiquitin protein ligase binding, protein binding,                                          |                                                                                                                                                                                                                                                                                                                                                                                                                              |
| MRM1       | 2.41 | <0.001 | <0.001 | mitochondrial matrix, mitochondrion,                                            | rRNA (guanine) methyltransferase activity, protein binding, RNA binding,                    | rRNA 2'-O-methylation, rRNA modification,                                                                                                                                                                                                                                                                                                                                                                                    |
| SRMS       | 2.2  | 0.027  | 0.032  | extrinsic component of cytoplasmic side of plasma membrane, cytosol, cytoplasm, | ATP binding, protein binding, signaling receptor binding, protein tyrosine kinase activity, | innate immune response, peptidyl-tyrosine autophosphorylation, cell differentiation, peptidyl-tyrosine phosphorylation, regulation of signal transduction, transmembrane receptor protein tyrosine kinase signaling pathway,                                                                                                                                                                                                 |
| AC239859.6 | 2.18 | 0.02   | 0.03   |                                                                                 |                                                                                             |                                                                                                                                                                                                                                                                                                                                                                                                                              |

|               |      |        |        |                                                                                                                                          |                                                                                                                               |                                                                                                                                                                                                                                                                                                                                      |
|---------------|------|--------|--------|------------------------------------------------------------------------------------------------------------------------------------------|-------------------------------------------------------------------------------------------------------------------------------|--------------------------------------------------------------------------------------------------------------------------------------------------------------------------------------------------------------------------------------------------------------------------------------------------------------------------------------|
| LRRC37A5<br>P | 1.95 | 0.049  | 0.049  |                                                                                                                                          |                                                                                                                               |                                                                                                                                                                                                                                                                                                                                      |
|               |      |        |        |                                                                                                                                          | inositol-1,3,4-trisphosphate 5-kinase activity, inositol-1,3,4-trisphosphate 6-kinase activity, inositol                      | necroptotic process, inositol phosphorylation, inositol                                                                                                                                                                                                                                                                              |
| ITPK1         | 1.68 | <0.001 | <0.001 | apical plasma membrane, cytosol,                                                                                                         | tetrakisphosphate 1-kinase activity, isomerase activity, inositol tetrakisphosphate 6-kinase activity, magnesium ion binding, | trisphosphate metabolic process, neural tube development, blood coagulation, signal transduction,                                                                                                                                                                                                                                    |
| AC010643.1    | 1.31 | 0.034  | 0.04   |                                                                                                                                          |                                                                                                                               |                                                                                                                                                                                                                                                                                                                                      |
|               |      |        |        |                                                                                                                                          |                                                                                                                               | regulation of anoikis, regulation of endothelial cell-matrix adhesion via fibronectin, regulation of heterotypic cell-cell adhesion, regulation of cell migration, regulation of cell population proliferation, signal transduction, heterophilic cell-cell adhesion via plasma membrane cell adhesion molecules, apoptotic process, |
| CEACAM6       | 1.28 | <0.001 | <0.001 | azurophil granule membrane, anchored component of membrane, apical plasma membrane, cell surface, extracellular space,                   | protein heterodimerization activity, protein binding,                                                                         |                                                                                                                                                                                                                                                                                                                                      |
| AL359198.1    | 1.26 | 0.041  | 0.044  |                                                                                                                                          |                                                                                                                               |                                                                                                                                                                                                                                                                                                                                      |
| GTF2IP1       | 1.22 | 0.021  | 0.03   |                                                                                                                                          |                                                                                                                               |                                                                                                                                                                                                                                                                                                                                      |
|               |      |        |        | eukaryotic 48S preinitiation complex, eukaryotic 43S preinitiation complex, eukaryotic translation initiation factor 3 complex, cytosol, | ribosome binding, translation initiation factor binding, protein binding, RNA binding,                                        | regulation of mRNA binding, regulation of translation, translational initiation, formation of cytoplasmic translation initiation complex, cellular response to leukemia                                                                                                                                                              |
| EIF3C         | 1.16 | 0.012  | 0.025  |                                                                                                                                          |                                                                                                                               |                                                                                                                                                                                                                                                                                                                                      |
|               |      |        |        |                                                                                                                                          | histone binding, chromatin DNA binding,                                                                                       | inhibitory factor, osteoclast fusion, cellular response to lipopolysaccharide, bone trabecula                                                                                                                                                                                                                                        |
| SBNO2         | 1.13 | <0.001 | <0.001 | nucleus,                                                                                                                                 |                                                                                                                               |                                                                                                                                                                                                                                                                                                                                      |

|       |      |       |       |                                                                                                                                                  |                                                                                                                                                                                           |                                                                                                                                                                                                                                                                                                                                                                                                                                                                                                                                                                                                                      |
|-------|------|-------|-------|--------------------------------------------------------------------------------------------------------------------------------------------------|-------------------------------------------------------------------------------------------------------------------------------------------------------------------------------------------|----------------------------------------------------------------------------------------------------------------------------------------------------------------------------------------------------------------------------------------------------------------------------------------------------------------------------------------------------------------------------------------------------------------------------------------------------------------------------------------------------------------------------------------------------------------------------------------------------------------------|
|       |      |       |       |                                                                                                                                                  |                                                                                                                                                                                           | morphogenesis, regulation of inflammatory response, regulation of transcription by RNA polymerase II, regulation of DNA-templated transcription, osteoclast differentiation, bone mineralization, macrophage activation involved in immune response, response to sodium phosphate, biomineralization, leukotriene transport, transmembrane transport, calcium ion homeostasis, phosphate ion homeostasis, ATP metabolic process, response to magnesium ion, cellular phosphate ion homeostasis, inorganic diphosphate transport, ATP transport, gene expression, response to xenobiotic stimulus, visual perception, |
| ABCC6 | 1.02 | 0.014 | 0.029 | basolateral plasma membrane, integral component of membrane, plasma membrane, endoplasmic reticulum membrane, nucleoplasm, extracellular region, | ATPase-coupled inorganic anion transmembrane transporter activity, ATPase-coupled transmembrane transporter activity, ABC-type glutathione S-conjugate transporter activity, ATP binding, |                                                                                                                                                                                                                                                                                                                                                                                                                                                                                                                                                                                                                      |

| gene_sym   | log2FoldChange | p-value | q-value | Cellular_Component_Term                                                       | Molecular_Function_Term                                                                     | Biological_Process_Term                                                                                                    |
|------------|----------------|---------|---------|-------------------------------------------------------------------------------|---------------------------------------------------------------------------------------------|----------------------------------------------------------------------------------------------------------------------------|
| IGSF23     | -4.74          | 0.007   | 0.051   | integral component of membrane,                                               |                                                                                             |                                                                                                                            |
| AC090673.1 | -4.64          | 0.023   | 0.063   |                                                                               |                                                                                             |                                                                                                                            |
| ARR3       | -4.53          | 0.032   | 0.056   | synapse, cytoplasm, photoreceptor inner segment, photoreceptor outer segment, | phosphoprotein binding, protein binding, opsin binding, G protein-coupled receptor binding, | visual perception, signal transduction, G protein-coupled receptor internalization, regulation of protein phosphorylation, |

|            |       |        |       |                                                                                                                                                                                                                                           |                                      |                                                                                                                                            |
|------------|-------|--------|-------|-------------------------------------------------------------------------------------------------------------------------------------------------------------------------------------------------------------------------------------------|--------------------------------------|--------------------------------------------------------------------------------------------------------------------------------------------|
| AC007405.3 | -4.38 | 0.021  | 0.06  |                                                                                                                                                                                                                                           |                                      |                                                                                                                                            |
| GPR158     | -4.37 | 0.026  | 0.058 | integral component of<br>membrane, plasma membrane,                                                                                                                                                                                       | G protein-coupled receptor activity, | protein localization to plasma<br>membrane, G protein-coupled<br>receptor signaling pathway,                                               |
| AL009178.3 | -4.35 | 0.03   | 0.057 |                                                                                                                                                                                                                                           |                                      |                                                                                                                                            |
| AL590006.1 | -4.3  | >0.001 | 0.009 |                                                                                                                                                                                                                                           |                                      |                                                                                                                                            |
| AC096720.2 | -4.24 | 0.034  | 0.051 |                                                                                                                                                                                                                                           |                                      |                                                                                                                                            |
| INTS9-AS1  | -4.22 | 0.035  | 0.051 |                                                                                                                                                                                                                                           |                                      |                                                                                                                                            |
| AC007216.2 | -4.1  | 0.042  |       |                                                                                                                                                                                                                                           |                                      |                                                                                                                                            |
| MAGED4B    | -4.02 | 0.006  | 0.061 | nucleus,                                                                                                                                                                                                                                  | protein binding,                     | regulation of transcription by RNA<br>polymerase II,                                                                                       |
| AC096751.2 | -3.78 | 0.025  | 0.058 |                                                                                                                                                                                                                                           |                                      |                                                                                                                                            |
| AL512506.1 | -3.68 | 0.036  | 0.049 |                                                                                                                                                                                                                                           |                                      |                                                                                                                                            |
| AC104113.1 | -3.65 | 0.036  | 0.048 |                                                                                                                                                                                                                                           |                                      |                                                                                                                                            |
| CDC37P1    | -3.08 | 0.039  | 0.049 |                                                                                                                                                                                                                                           |                                      |                                                                                                                                            |
| LINC02256  | -3.05 | 0.02   | 0.064 |                                                                                                                                                                                                                                           |                                      |                                                                                                                                            |
| RN7SKP173  | -2.99 | 0.046  | 0.048 |                                                                                                                                                                                                                                           |                                      |                                                                                                                                            |
|            |       |        |       | Gemini of coiled bodies,<br>perikaryon, neuron projection,<br>cytoplasmic ribonucleoprotein<br>granule, SMN-Sm protein<br>complex, SMN complex, axon,<br>Z disc, nuclear body, Cajal<br>body, cytosol, cytoplasm,<br>nucleoplasm nucleus, |                                      |                                                                                                                                            |
| SMN2       | -2.98 | 0.021  | 0.062 |                                                                                                                                                                                                                                           | protein binding, RNA binding,        | nervous system development, DNA-<br>templated transcription termination,<br>spliceosomal snRNP assembly,<br>spliceosomal complex assembly, |
| SNORA71A   | -2.86 | 0.024  | 0.059 | nucleolus,                                                                                                                                                                                                                                |                                      | RNA processing,                                                                                                                            |
| LUNAR1     | -2.83 | 0.01   | 0.057 |                                                                                                                                                                                                                                           |                                      |                                                                                                                                            |
| AP001992.1 | -2.78 | 0.037  | 0.047 |                                                                                                                                                                                                                                           |                                      |                                                                                                                                            |



|            |       |        |       |                                                                                                               |                                                                                                          |                                                                                                                                                                                                                                                                                                                                                                                            |
|------------|-------|--------|-------|---------------------------------------------------------------------------------------------------------------|----------------------------------------------------------------------------------------------------------|--------------------------------------------------------------------------------------------------------------------------------------------------------------------------------------------------------------------------------------------------------------------------------------------------------------------------------------------------------------------------------------------|
| UBR7       | -2.69 | 0.019  | 0.07  |                                                                                                               | ubiquitin protein ligase activity, zinc ion binding,                                                     | protein ubiquitination,                                                                                                                                                                                                                                                                                                                                                                    |
| AC108448.3 | -2.66 | 0.042  | 0.049 |                                                                                                               |                                                                                                          |                                                                                                                                                                                                                                                                                                                                                                                            |
| AC067930.5 | -2.53 | 0.049  | 0.049 |                                                                                                               |                                                                                                          |                                                                                                                                                                                                                                                                                                                                                                                            |
| LY6E       | -2.48 | 0.015  | 0.07  | anchored component of membrane, plasma membrane, extracellular region,                                        | acetylcholine receptor inhibitor activity, protein binding,                                              | regulation of signaling receptor activity, regulation of viral entry into host cell, cell surface receptor signaling pathway,                                                                                                                                                                                                                                                              |
| AC011330.1 | -2.39 | >0.001 | 0.009 |                                                                                                               |                                                                                                          |                                                                                                                                                                                                                                                                                                                                                                                            |
| SMIM11A    | -2.33 | 0.007  | 0.054 | integral component of membrane,                                                                               | protein binding,                                                                                         |                                                                                                                                                                                                                                                                                                                                                                                            |
| AC009185.1 | -2.27 | 0.033  | 0.052 |                                                                                                               |                                                                                                          |                                                                                                                                                                                                                                                                                                                                                                                            |
| ZNF365     | -2.25 | 0.043  | 0.048 | centrosome, cytoplasm,                                                                                        | metal ion binding, protein binding,                                                                      | dendrite arborization, regulation of DNA strand resection involved in replication fork processing, dendritic spine morphogenesis, regulation of oligodendrocyte differentiation, cerebellar molecular layer morphogenesis, regulation of neuron projection development, regulation of double-strand break repair via homologous recombination, telomere maintenance, telomere maintenance, |
| SPTIN5     | -2.06 | 0.028  | 0.058 | cell division site, septin complex, microtubule cytoskeleton, synaptic vesicle, septin ring, plasma membrane, | molecular adaptor activity, GTP binding, protein binding, structural molecule activity, GTPase activity, | regulation of synaptic vesicle exocytosis, cytoskeleton-dependent cytokinesis, social behavior, adult behavior, regulation of exocytosis,                                                                                                                                                                                                                                                  |

|            |       |       |       |                                                                                                                                                                                                                                                                                                                |                                                                                                                                                                                                                                                                                          |                                                                                                                                                                                                     |
|------------|-------|-------|-------|----------------------------------------------------------------------------------------------------------------------------------------------------------------------------------------------------------------------------------------------------------------------------------------------------------------|------------------------------------------------------------------------------------------------------------------------------------------------------------------------------------------------------------------------------------------------------------------------------------------|-----------------------------------------------------------------------------------------------------------------------------------------------------------------------------------------------------|
|            |       |       |       |                                                                                                                                                                                                                                                                                                                |                                                                                                                                                                                                                                                                                          | synaptic vesicle targeting, protein localization,                                                                                                                                                   |
| AL590644.1 | -2.06 | 0.032 | 0.057 | extracellular exosome, receptor complex, lysosomal lumen, microvillus membrane, brush border membrane, extrinsic component of external side of plasma membrane, endocytic vesicle, apical plasma membrane, clathrin-coated pit, cytosol, Golgi apparatus, endoplasmic reticulum, endosome, lysosomal membrane, |                                                                                                                                                                                                                                                                                          |                                                                                                                                                                                                     |
| CUBN       | -2.05 | 0.033 | 0.053 |                                                                                                                                                                                                                                                                                                                | protein homodimerization activity, cargo receptor activity, signaling receptor activity, cobalamin binding, protein binding, calcium ion binding,                                                                                                                                        | establishment of localization in cell, lipoprotein transport, response to bacterium, cobalamin metabolic process, cholesterol metabolic process, receptor-mediated endocytosis, tissue homeostasis, |
| GCOM2      | -2.02 | 0.036 | 0.048 |                                                                                                                                                                                                                                                                                                                |                                                                                                                                                                                                                                                                                          |                                                                                                                                                                                                     |
| DHRS11     | -1.97 | 0.003 | 0.032 | extracellular region,                                                                                                                                                                                                                                                                                          | cycloeucalenone reductase activity, 17-beta-hydroxysteroid dehydrogenase (NADP+) activity, 17-beta-ketosteroid reductase activity, 17-beta-hydroxysteroid dehydrogenase (NAD+) activity, estradiol 17-beta-dehydrogenase activity, 3-keto sterol reductase activity, nucleotide binding, | estrogen biosynthetic process, steroid biosynthetic process,                                                                                                                                        |
| NAPEPLD    | -1.93 | 0.019 | 0.072 | extracellular exosome, membrane-bounded organelle, photoreceptor outer segment membrane, Golgi apparatus, early endosome, cytoplasm,                                                                                                                                                                           | N-acetylphosphatidylethanolamine-hydrolysing phospholipase activity, N-acylphosphatidylethanolamine-specific phospholipase D activity, protein binding, bile acid binding, zinc ion binding,                                                                                             | regulation of brown fat cell differentiation, N-acylphosphatidylethanolamine metabolic process, regulation of inflammatory response, host-mediated regulation of intestinal                         |

|            |       |       |       |                                                                                                                                                                                                                      |                                                                                                                                                                       |                                                                                                                                                                                                                                                                            |
|------------|-------|-------|-------|----------------------------------------------------------------------------------------------------------------------------------------------------------------------------------------------------------------------|-----------------------------------------------------------------------------------------------------------------------------------------------------------------------|----------------------------------------------------------------------------------------------------------------------------------------------------------------------------------------------------------------------------------------------------------------------------|
|            |       |       |       | nucleoplasm, nuclear envelope, Golgi membrane,                                                                                                                                                                       |                                                                                                                                                                       | microbiota composition, phospholipid catabolic process, temperature homeostasis, retinoid metabolic process, regulation of histone H3-K27 methylation, cellular response to DNA damage stimulus, regulation of DNA-templated transcription, chromatin organization,        |
| PHF1       | -1.93 | 0.035 | 0.05  | site of double-strand break, centrosome, cytoplasm, nucleoplasm, nucleus,                                                                                                                                            | histone methyltransferase binding, metal ion binding, methylated histone binding, protein binding, chromatin binding, DNA binding, transcription corepressor binding, |                                                                                                                                                                                                                                                                            |
| AC134775.1 | -1.8  | 0.032 | 0.063 |                                                                                                                                                                                                                      |                                                                                                                                                                       |                                                                                                                                                                                                                                                                            |
| HERC2P8    | -1.74 | 0.024 | 0.06  |                                                                                                                                                                                                                      |                                                                                                                                                                       |                                                                                                                                                                                                                                                                            |
|            |       |       |       | anchoring junction, collagen-containing extracellular matrix, synaptic cleft, neuromuscular junction, extracellular matrix, cell junction, plasma membrane, extracellular space, basement membrane, collagen trimer, |                                                                                                                                                                       | establishment of protein localization to membrane, skeletal muscle acetylcholine-gated channel clustering, extracellular matrix organization, regulation of synaptic assembly at neuromuscular junction, acetylcholine catabolic process in synaptic cleft,                |
| COLQ       | -1.74 | 0.03  | 0.057 |                                                                                                                                                                                                                      | heparin binding, protein binding, extracellular matrix structural constituent,                                                                                        |                                                                                                                                                                                                                                                                            |
|            |       |       |       | integral component of membrane,                                                                                                                                                                                      |                                                                                                                                                                       |                                                                                                                                                                                                                                                                            |
| PRRT1B     | -1.73 | 0.043 | 0.049 |                                                                                                                                                                                                                      |                                                                                                                                                                       | regulation of wound healing, regulation of cell death, bone development, regulation of inflammatory response, regulation of smooth muscle cell proliferation, regulation of fat cell differentiation, glucose homeostasis, regulation of Wnt signaling pathway, regulation |
| WISP1      | -1.64 | 0.009 | 0.056 | extracellular matrix, cytosol, extracellular space,                                                                                                                                                                  | heparin binding, protein binding, integrin binding,                                                                                                                   |                                                                                                                                                                                                                                                                            |

|          |       |       |       |                                                                                                   |                                        |                                                                                                                                                                                                                                                                                                                                                                                                                                                                                                                                                                                                                                                                                                                                                                                                                                            |
|----------|-------|-------|-------|---------------------------------------------------------------------------------------------------|----------------------------------------|--------------------------------------------------------------------------------------------------------------------------------------------------------------------------------------------------------------------------------------------------------------------------------------------------------------------------------------------------------------------------------------------------------------------------------------------------------------------------------------------------------------------------------------------------------------------------------------------------------------------------------------------------------------------------------------------------------------------------------------------------------------------------------------------------------------------------------------------|
|          |       |       |       |                                                                                                   |                                        | of smooth muscle cell migration,<br>cell-cell signaling, signal<br>transduction, cell adhesion,<br>regulation of cytokine production,<br>RNA processing,<br>cell-cell adhesion via plasma-<br>membrane adhesion molecules,<br>cochlea development, protein<br>localization to plasma membrane,<br>condensed mesenchymal cell<br>proliferation, digestive tract<br>development, ossification involved<br>in bone maturation, post-anal tail<br>morphogenesis, hippo signaling,<br>adherens junction organization,<br>neurogenesis, neural tube<br>development, pattern specification<br>process, multicellular organism<br>development, cell-cell junction<br>assembly, cell migration involved in<br>endocardial cushion formation,<br>mitral valve formation, branching<br>involved in ureteric bud<br>morphogenesis, cell morphogenesis, |
| SNORA71C | -1.63 | 0.036 | 0.05  | nucleolus,                                                                                        |                                        |                                                                                                                                                                                                                                                                                                                                                                                                                                                                                                                                                                                                                                                                                                                                                                                                                                            |
| DCHS1    | -1.6  | 0.038 | 0.048 | apical part of cell, catenin<br>complex, integral component<br>of membrane, adherens<br>junction, | cadherin binding, calcium ion binding, |                                                                                                                                                                                                                                                                                                                                                                                                                                                                                                                                                                                                                                                                                                                                                                                                                                            |
| AGGF1P2  | -1.57 | 0.046 | 0.049 |                                                                                                   |                                        |                                                                                                                                                                                                                                                                                                                                                                                                                                                                                                                                                                                                                                                                                                                                                                                                                                            |
| CCHCR1   | -1.55 | 0.017 | 0.072 | cytosol, centriole, nucleus,                                                                      | protein binding,                       | cell differentiation, protein export<br>from nucleus,                                                                                                                                                                                                                                                                                                                                                                                                                                                                                                                                                                                                                                                                                                                                                                                      |
| DTNA     | -1.52 | 0.02  | 0.069 | anchoring junction, synapse,<br>intermediate filament                                             | zinc ion binding, protein binding,     | synaptic signaling, neuromuscular<br>synaptic transmission, chemical                                                                                                                                                                                                                                                                                                                                                                                                                                                                                                                                                                                                                                                                                                                                                                       |

|            |       |        |       |                                                                                                   |                                                                                                                                                                 |                                                                                                                                                                                                                                                                                                                                                                                                                              |
|------------|-------|--------|-------|---------------------------------------------------------------------------------------------------|-----------------------------------------------------------------------------------------------------------------------------------------------------------------|------------------------------------------------------------------------------------------------------------------------------------------------------------------------------------------------------------------------------------------------------------------------------------------------------------------------------------------------------------------------------------------------------------------------------|
|            |       |        |       | cytoskeleton, protein-containing complex, cell junction, plasma membrane, cytoplasm, nucleoplasm, |                                                                                                                                                                 | synaptic transmission, striated muscle contraction,                                                                                                                                                                                                                                                                                                                                                                          |
|            |       |        |       |                                                                                                   |                                                                                                                                                                 | regulation of DNA-templated transcription initiation, regulation of intrinsic apoptotic signaling pathway, homeostasis of number of cells, fibroblast proliferation, regulation of DNA-templated transcription, ribosome biogenesis, cytoplasm organization, nucleolus organization, transcription initiation at RNA polymerase I promoter, in utero embryonic development, RNA polymerase I preinitiation complex assembly, |
| RRN3       | -1.41 | 0.032  | 0.054 | nucleus,                                                                                          | RNA polymerase I general transcription initiation factor activity, RNA polymerase I core promoter sequence-specific DNA binding, RNA polymerase I core binding, | ephrin receptor signaling pathway,                                                                                                                                                                                                                                                                                                                                                                                           |
|            |       |        |       |                                                                                                   |                                                                                                                                                                 | axon guidance, multicellular organism development,                                                                                                                                                                                                                                                                                                                                                                           |
| EPHA10     | -1.34 | 0.002  | 0.026 | receptor complex, neuron projection, plasma membrane, extracellular region,                       | ATP binding, protein binding, transmembrane-ephrin receptor activity, transmembrane receptor protein tyrosine kinase activity,                                  | transmembrane receptor protein tyrosine kinase signaling pathway,                                                                                                                                                                                                                                                                                                                                                            |
| RASA4CP    | -1.34 | 0.042  | 0.049 |                                                                                                   |                                                                                                                                                                 |                                                                                                                                                                                                                                                                                                                                                                                                                              |
| AL672207.1 | -1.33 | 0.045  | 0.05  |                                                                                                   |                                                                                                                                                                 |                                                                                                                                                                                                                                                                                                                                                                                                                              |
|            |       |        |       | integral component of                                                                             |                                                                                                                                                                 |                                                                                                                                                                                                                                                                                                                                                                                                                              |
| STEAP1B    | -1.26 | 0.028  | 0.059 | membrane, plasma membrane, endosome,                                                              | protein binding,                                                                                                                                                |                                                                                                                                                                                                                                                                                                                                                                                                                              |
|            |       |        |       |                                                                                                   |                                                                                                                                                                 |                                                                                                                                                                                                                                                                                                                                                                                                                              |
| SDCCAG8    | -1.24 | >0.001 | 0.007 | photoreceptor cell cilium, ciliary basal body, centriolar                                         | protein binding,                                                                                                                                                | regulation of cilium assembly, tube formation, microtubule organizing                                                                                                                                                                                                                                                                                                                                                        |

|            |       |       |       |                                                                                                                                                                   |                                                                                                                                                                                                                     |                                                                                                                                                                                                                                                                                                                                                                                                                                                                                                                                                                                                  |
|------------|-------|-------|-------|-------------------------------------------------------------------------------------------------------------------------------------------------------------------|---------------------------------------------------------------------------------------------------------------------------------------------------------------------------------------------------------------------|--------------------------------------------------------------------------------------------------------------------------------------------------------------------------------------------------------------------------------------------------------------------------------------------------------------------------------------------------------------------------------------------------------------------------------------------------------------------------------------------------------------------------------------------------------------------------------------------------|
|            |       |       |       | satellite, cell-cell junction,<br>cytosol, centriole, centrosome,                                                                                                 |                                                                                                                                                                                                                     | center organization, cell projection<br>organization, establishment of cell<br>polarity, centrosome cycle, neuron<br>migration,                                                                                                                                                                                                                                                                                                                                                                                                                                                                  |
| C1DP1      | -1.17 | 0.029 | 0.058 |                                                                                                                                                                   |                                                                                                                                                                                                                     |                                                                                                                                                                                                                                                                                                                                                                                                                                                                                                                                                                                                  |
|            |       |       |       |                                                                                                                                                                   |                                                                                                                                                                                                                     | cellular response to amyloid-beta,<br>regulation of ERK1 and ERK2<br>cascade, chemotaxis, regulation of<br>phagocytosis, regulation of<br>inflammatory response, regulation of<br>innate immune response, defense<br>response to bacterium, regulation of<br>superoxide anion generation,<br>calcium-mediated signaling,<br>regulation of cytosolic calcium ion<br>concentration, G protein-coupled<br>receptor signaling pathway, cell<br>surface receptor signaling pathway,<br>cell adhesion, complement receptor<br>mediated signaling pathway,<br>regulation of protein<br>phosphorylation, |
| FPR2       | -1.12 | 0.046 | 0.049 | ficolin-1-rich granule<br>membrane, tertiary granule<br>membrane, specific granule<br>membrane, integral<br>component of membrane,<br>plasma membrane, cytoplasm, | signaling receptor activity, protein binding,<br>scavenger receptor binding, N-formyl peptide<br>receptor activity, G protein-coupled receptor<br>activity, complement receptor activity, amyloid-<br>beta binding, |                                                                                                                                                                                                                                                                                                                                                                                                                                                                                                                                                                                                  |
| RPL17      | -1.1  | 0.013 | 0.068 | cytosolic ribosome, cytosol,<br>cytoplasm, nucleus,                                                                                                               | protein binding, structural constituent of<br>ribosome, RNA binding,                                                                                                                                                | translation, cytoplasmic translation,                                                                                                                                                                                                                                                                                                                                                                                                                                                                                                                                                            |
| AC138466.4 | -1.07 | 0.024 | 0.055 |                                                                                                                                                                   |                                                                                                                                                                                                                     |                                                                                                                                                                                                                                                                                                                                                                                                                                                                                                                                                                                                  |
| PHYHIP     | -1.03 | 0.048 | 0.049 | cytoplasm,                                                                                                                                                        | protein tyrosine kinase binding,                                                                                                                                                                                    | protein localization,                                                                                                                                                                                                                                                                                                                                                                                                                                                                                                                                                                            |
